# Supplementary material for: Cosmogenic nuclide dating of two stacked ice masses: Ong Valley, Antarctica
Source: Copernicus journal article supplement (doi:10.5194/tc-16-2793-2022), 2022-07-15
Supplement: Supplementary file 1 [file tc-16-2793-2022-supplement.zip]

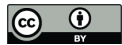

## *Supplement of*

# **Cosmogenic nuclide dating of two stacked ice masses: Ong Valley, Antarctica**

**Marie Bergelin et al.**

*Correspondence to:* Marie Bergelin ([marie.bergelin@und.edu](mailto:marie.bergelin@und.edu))

- tc-16-2793-2022-supplement-title-page.pdf
- IceCoreOptimizer\_20211208
  - MC\_optimizer.m
  - P\_mu\_total\_alpha1.m
  - P\_of\_z.m
  - READ\_ME.txt
  - antatm.m
  - ecdf.m
  - get\_burial\_age.m
  - get\_misfit.m
  - nonlcon.m
  - objective\_sublimation\_model.m
  - plot\_forward\_model.m
  - plot\_forward\_model\_sample\_depth.m
  - precalculate\_P\_of\_z.m
  - save\_data\_core1.m
  - stone2000.m
  - sublimation\_model\_params.m
  - z\_of\_t.m
- Table\_S\_OV\_OD1\_Al26\_UVM.xlsx
- Table\_S\_OV\_OD1\_Be10\_UVM.xlsx
- Table\_S\_OV\_OD1\_Ne21\_BGC.xlsx
- Table\_S\_OV\_OD1\_surface\_Ne21\_BGC.xlsx

- Table\_S\_OV\_middle\_boulders\_Be10\_BGC.xlsx
- Table\_S\_OV\_middle\_boulders\_Ne21\_BGC.xlsx
- \_\_MACOSX
  - .\_IceCoreOptimizer\_20211208
  - IceCoreOptimizer\_20211208
    - \* .\_MC\_optimizer.m
    - \* .\_P\_mu\_total\_alpha1.m
    - \* .\_P\_of\_z.m
    - \* .\_READ\_ME.txt
    - \* .\_antatm.m
    - \* .\_ecdf.m
    - \* .\_get\_burial\_age.m
    - \* .\_get\_misfit.m
    - \* .\_nonlcon.m
    - \* .\_objective\_sublimation\_model.m
    - \* .\_plot\_forward\_model.m
    - \* .\_plot\_forward\_model\_sample\_depth.m
    - \* .\_precalculate\_P\_of\_z.m
    - \* .\_save\_data\_core1.m
    - \* .\_stone2000.m
    - \* .\_sublimation\_model\_params.m
    - \* .\_z\_of\_t.m
- figS1.jpg
- figS2 .pdf

The copyright of individual parts of the supplement might differ from the article licence.
